# Supplementary material
Source: PubMed Central journal article supplement (PMC4835345)
Supplement: NIHMS773024-supplement-Supp_Fig1.pdf [file NIHMS773024-supplement-Supp_Fig1.pdf]

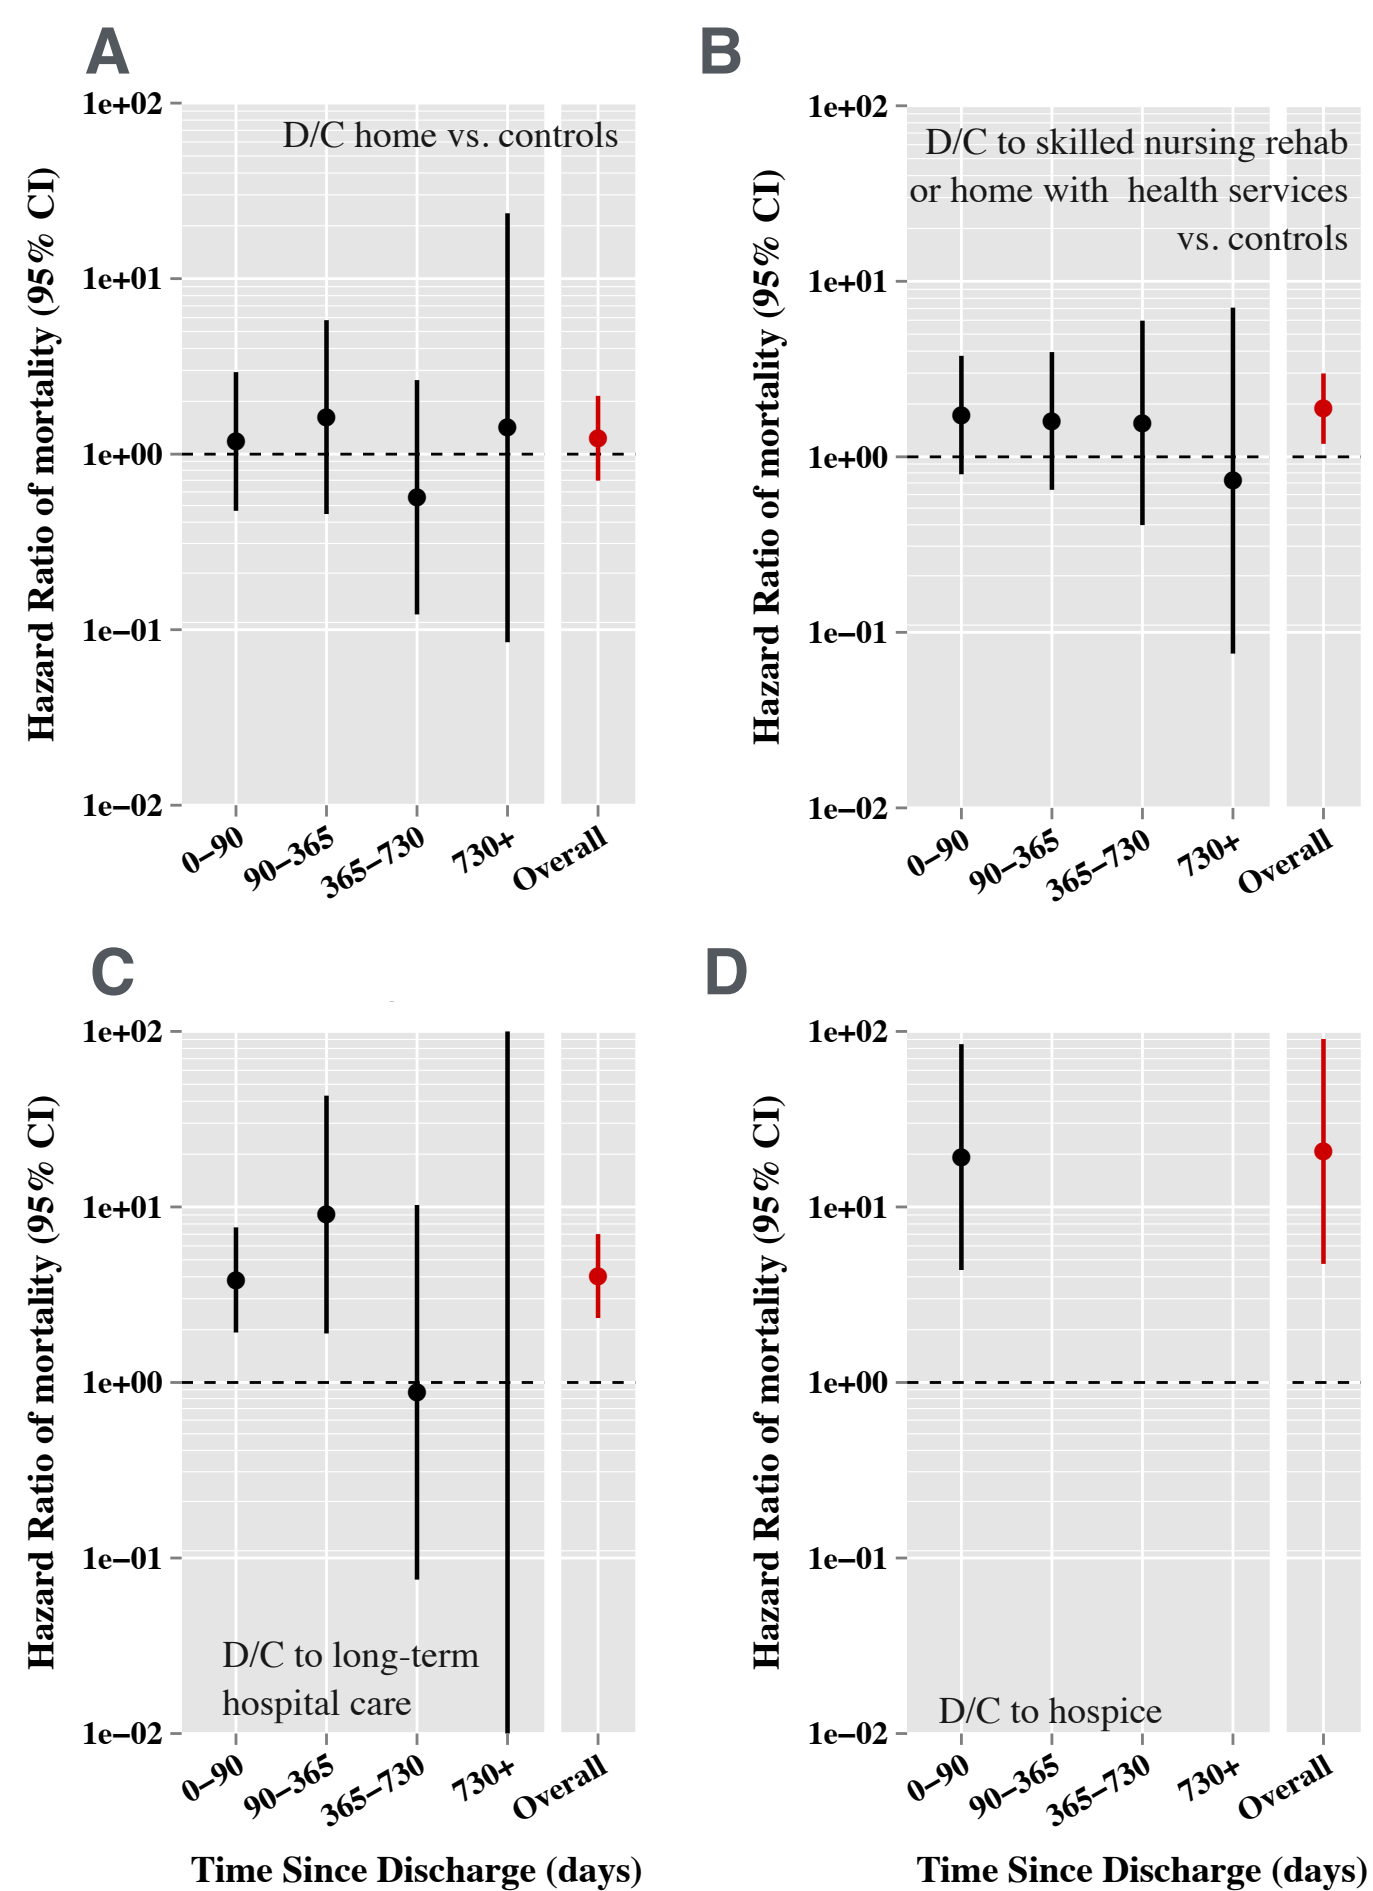

**Figure S1: Cox proportional hazard ratios of mortality following discharge for IHCA survivors versus matched hospital controls over discrete observation windows following discharge and stratified by IHCA patient discharge disposition.** Data were stratified by discharge disposition of IHCA patients (A) home without health services; (B) home with health services, skilled nursing, rehabilitation, intermediate care facility or short-term hospital stay; (C) long-term hospital care and; (D) hospice care. Shaded regions indicate 95% confidence bands. Hazard ratios are those of IHCA patients in their respective strata versus their originally matched non-IHCA controls, regardless of discharge disposition of the controls - thus allowing discordance of discharge disposition. “Overall” is the combined hazard ratio for mortality for the entire follow-up period post-discharge. 95% confidence intervals are shown surrounding the point estimate for the hazard ratio. Hazard ratios with 95% confidence intervals not including the value 1 are statistically significant to an alpha of 0.05. (Note log-scale on y-axis).
