# Supplementary material
Source: PubMed Central journal article supplement (PMC4835345)
Supplement: NIHMS773024-supplement-Supp_Table1.pdf [file NIHMS773024-supplement-Supp_Table1.pdf]

|                           | IHCA<br>Survivors to<br>Discharge | Non-IHCA<br>Hospital<br>Controls | Home                |                | Skilled<br>Nursing,<br>Home w/<br>services,<br>Rehab |                | Long-term      |                | Hospice        |                | Other <sup>b</sup> |                |
|---------------------------|-----------------------------------|----------------------------------|---------------------|----------------|------------------------------------------------------|----------------|----------------|----------------|----------------|----------------|--------------------|----------------|
|                           |                                   |                                  | without<br>services |                | Home w/<br>services,<br>Rehab                        |                | hospital stay  |                |                |                |                    |                |
|                           |                                   |                                  | IHCA                | Non-<br>IHCA   | IHCA                                                 | Non-<br>IHCA   | IHCA           | Non-<br>IHCA   | IHCA           | Non-<br>IHCA   | IHCA               | Non-<br>IHCA   |
| <b>Patients, n</b>        | 238                               | 658                              | 78                  | 221            | 89                                                   | 249            | 45             | 132            | 17             | 45             | 9                  | 22             |
| 3:1 match <sup>c</sup>    | 196 (82%)                         | 588 (89%)                        | 68                  | 204            | 77                                                   | 231            | 42             | 126            | 13             | 39             | 6                  | 18             |
| 2:1 match                 | 28 (12%)                          | 56 (9%)                          | 7                   | 14             | 6                                                    | 12             | 3              | 6              | 2              | 4              | 1                  | 2              |
| 1:1 match                 | 14 (6%)                           | 14 (2%)                          | 3                   | 3              | 6                                                    | 6              | 0              | 0              | 2              | 2              | 2                  | 2              |
| <b>Male, %</b>            | 50.8                              | 50.8                             | 60.2                | 61.5           | 51.6                                                 | 50.6           | 33.3           | 32.5           | 41.2           | 44.4           | 66.6               | 72.7           |
| <b>Age, mean<br/>(SD)</b> | 61.1<br>(14.3)                    | 61.7<br>(14.2)                   | 58.6<br>(13.4)      | 59.3<br>(13.4) | 61.5<br>(14.6)                                       | 61.8<br>(14.7) | 66.1<br>(11.8) | 66.2<br>(11.8) | 62.6<br>(18.4) | 63.7<br>(17.7) | 51.8<br>(16.0)     | 50.6<br>(15.9) |
| (p-value)                 | p = 0.63                          |                                  | p = 0.72            |                | p = 0.87                                             |                | p = 0.93       |                | p = 0.84       |                | p = 0.73           |                |
| <b>Race, n</b>            |                                   |                                  |                     |                |                                                      |                |                |                |                |                |                    |                |
| White                     | 99 (42%)                          | 274 (42%)                        | 35                  | 101            | 42                                                   | 116            | 14             | 42             | 7              | 21             | 1                  | 1              |
| Black                     | 124 (52%)                         | 344 (52%)                        | 39                  | 108            | 41                                                   | 116            | 29             | 84             | 8              | 22             | 7                  | 18             |
| Other                     | 15 (6%)                           | 40 (6%)                          | 4                   | 12             | 6                                                    | 17             | 2              | 6              | 2              | 2              | 1                  | 3              |
| <b>Admit Urgency, n</b>   |                                   |                                  |                     |                |                                                      |                |                |                |                |                |                    |                |
| Elective                  | 56                                | 159                              | 21                  | 62             | 22                                                   | 61             | 11             | 33             | 1              | 3              | 1                  | 3              |
| Urgent                    | 60                                | 161                              | 15                  | 42             | 27                                                   | 75             | 8              | 24             | 7              | 18             | 3                  | 6              |
| Emergent                  | 122                               | 338                              | 42                  | 117            | 40                                                   | 113            | 26             | 75             | 9              | 24             | 5                  | 13             |
| <b>Admit Specialty, n</b> |                                   |                                  |                     |                |                                                      |                |                |                |                |                |                    |                |
| Cardiology                | 36                                | 98                               | 18                  | 52             | 14                                                   | 39             | 1              | 3              | 2              | 6              | 1                  | 1              |
| Cardiovasc. Surg          | 20                                | 54                               | 7                   | 21             | 9                                                    | 26             | 4              | 12             | 0              | 0              | 0                  | 0              |
| Gastroenterology          | 1                                 | 2                                | 0                   | 0              | 1                                                    | 2              | 0              | 0              | 0              | 0              | 0                  | 0              |
| General Surgery           | 20                                | 56                               | 3                   | 8              | 8                                                    | 22             | 6              | 18             | 2              | 6              | 1                  | 2              |
| Gyn. Onc.                 | 1                                 | 3                                | 0                   | 0              | 0                                                    | 0              | 1              | 3              | 0              | 0              | 0                  | 0              |
| Hematology                | 2                                 | 6                                | 1                   | 3              | 0                                                    | 0              | 0              | 0              | 1              | 3              | 0                  | 0              |
| Hospital Medicine         | 60                                | 175                              | 16                  | 47             | 24                                                   | 70             | 12             | 36             | 5              | 15             | 3                  | 9              |
| Medical Onc.              | 2                                 | 6                                | 0                   | 0              | 1                                                    | 3              | 1              | 3              | 0              | 0              | 0                  | 0              |
| Nephrology                | 10                                | 26                               | 3                   | 9              | 5                                                    | 11             | 0              | 0              | 0              | 0              | 2                  | 6              |
| Neurology                 | 5                                 | 3                                | 0                   | 0              | 1                                                    | 3              | 3              | 9              | 1              | 1              | 0                  | 0              |
| Neuroradiology            | 1                                 | 3                                | 1                   | 3              | 0                                                    | 0              | 0              | 0              | 0              | 0              | 0                  | 0              |
| Neurosurgery              | 11                                | 30                               | 3                   | 7              | 4                                                    | 12             | 3              | 8              | 1              | 3              | 0                  | 0              |
| Oral Surgery              | 2                                 | 2                                | 2                   | 2              | 0                                                    | 0              | 0              | 0              | 0              | 0              | 0                  | 0              |
| Otolaryngology            | 4                                 | 12                               | 0                   | 0              | 3                                                    | 9              | 1              | 3              | 0              | 0              | 0                  | 0              |
| Psychiatry                | 2                                 | 4                                | 0                   | 0              | 1                                                    | 3              | 0              | 0              | 0              | 0              | 1                  | 1              |
| Pulmonary                 | 27                                | 27                               | 11                  | 31             | 6                                                    | 16             | 7              | 19             | 3              | 7              | 0                  | 0              |
| Radiology                 | 1                                 | 3                                | 1                   | 3              | 0                                                    | 0              | 0              | 0              | 0              | 0              | 0                  | 0              |
| Reconstruc.Plastic        | 1                                 | 3                                | 1                   | 3              | 0                                                    | 0              | 0              | 0              | 0              | 0              | 0                  | 0              |
| Rehabilitation            | 3                                 | 9                                | 0                   | 0              | 3                                                    | 9              | 0              | 0              | 0              | 0              | 0                  | 0              |
| Surgical Onc.             | 1                                 | 3                                | 0                   | 0              | 1                                                    | 3              | 0              | 0              | 0              | 0              | 0                  | 0              |
| Thoracic Surgery          | 15                                | 41                               | 6                   | 18             | 5                                                    | 13             | 3              | 9              | 1              | 1              | 0                  | 0              |
| Urology                   | 6                                 | 17                               | 3                   | 8              | 1                                                    | 3              | 1              | 3              | 0              | 0              | 1                  | 3              |
| Vascular Surgery          | 7                                 | 20                               | 2                   | 6              | 2                                                    | 5              | 2              | 6              | 1              | 3              | 0                  | 0              |
